# Supplementary material for: Recombinant FGF21 Attenuates Polychlorinated Biphenyl-Induced NAFLD/NASH by Modulating Hepatic Lipocalin-2 Expression
Source: MDPI journal article supplement (doi:10.3390/ijms23168899), 2022-08-10
Supplement: s1 [file s1]

**Supplementary Materials for:**

**Recombinant FGF21 attenuates polychlorinated biphenyl-induced NAFLD/NASH  
by modulating hepatic lipocalin-2 expression**

Hye Young Kim, and Young Hyun Yoo\*

Department of Anatomy and Cell Biology and BK21 program, Department of Translational  
Biomedical Science, Dong-A University College of Medicine, Busan, Republic of Korea

**Figures S1-3**

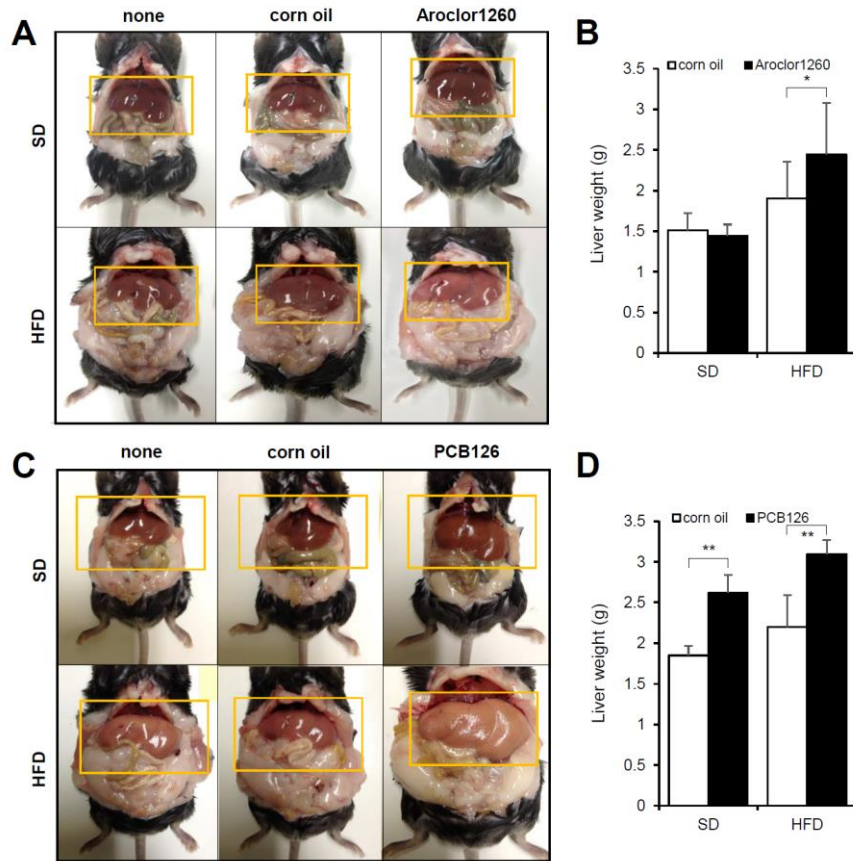

**Figure S1. Aroclor1260 and PCB126 exposure induces NAFLD/NASH in C57BL/6 mice.**

Eight-week-old male C57BL/6 mice were fed either a SD or HFD for 4 weeks and then treated with vehicle (corn oil), Aroclor1260 (20 mg/kg) or PCB126 (5 mg/kg) by intraperitoneal injection for a total of four injections (2, 3, 4 and 5 weeks) during the 6-week study duration.

(A&C) Representative photograph images of experimental animals. (B&D) Liver weight measurement. All values represent the mean $\pm$ SD, n = 6-10 mice per group. \*P < .05 and

\*\*P < .01.

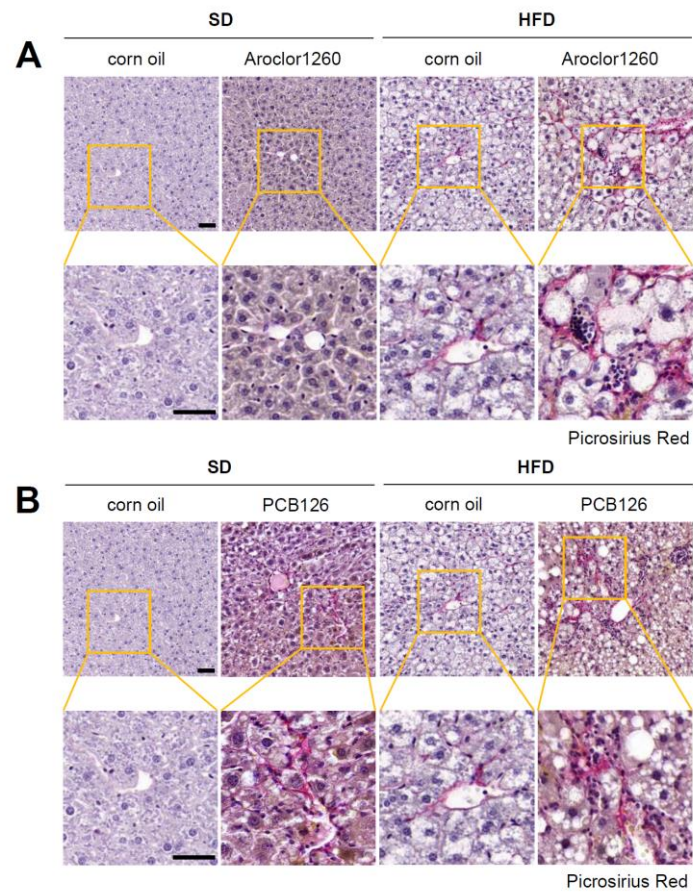

**Figure S2. PCB exposure induces fibrosis in mice fed a SD or HFD.** Eight-week-old male C57BL/6 mice were fed either a SD or HFD for 4 weeks and then treated with vehicle (corn oil), Aroclor1260 (20 mg/kg) or PCB126 (5 mg/kg) by intraperitoneal injection for a total of four injections (2, 3, 4 and 5 weeks) during the 6-week study duration. **(A&B)** Representative images of picrosirius red staining. Scale bar: 50 μm.

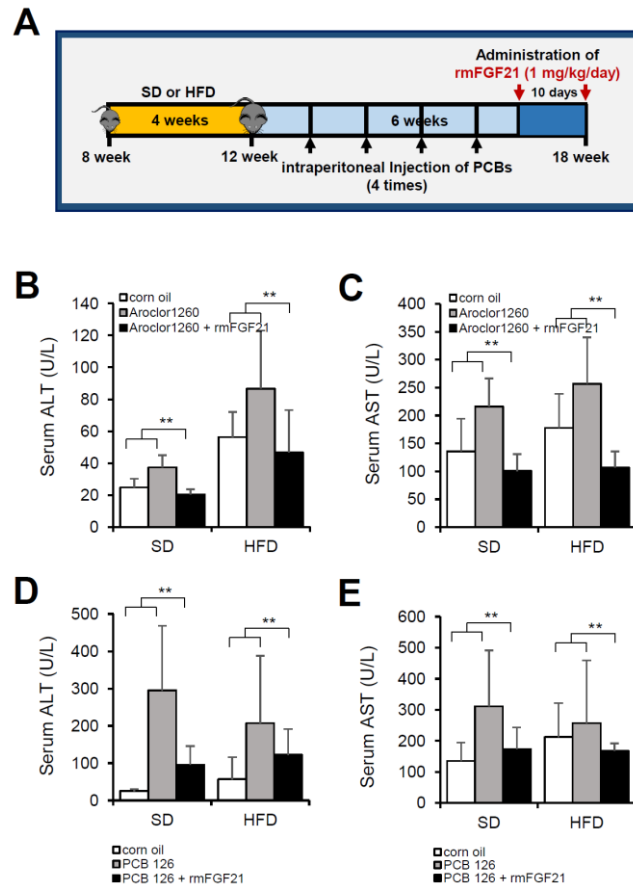

**Figure S3. Recombinant FGF21 decreases PCB-induced liver injury in mice fed a SD or HFD.** Eight-week-old male C57BL/6 mice were fed either a SD or HFD for 4 weeks and then treated with vehicle (corn oil), Aroclor1260 (20 mg/kg) or PCB126 (5 mg/kg) by intraperitoneal injection for a total of four injections (2, 3, 4 and 5 weeks) during the 6-week study duration. Aroclor1260- or PCB126-injected mice were intraperitoneally administered vehicle or rmFGF21 (1 mg/kg/day) once daily for 10 days. **(A)** Experimental design. **(B&D)** Serum ALT. **(C&E)** Serum AST. All values represent the mean $\pm$ SD, n = 7-9 mice per group. \*P < .05 and \*\*P < .01.
